# Supplementary material
Source: MDPI journal article supplement (https://www.mdpi.com/2227-9717/11/7/2141)
Supplement: s1 [file s1]

*Supplementary Data*

**Catalytic ozonation of Reactive Red 195 in aqueous solution over a**

**Co/Al<sub>2</sub>O<sub>3</sub>-CeO<sub>2</sub> catalyst**

**Zuoming Zhou, Xiaoyu Liu, Guohua Jing\***

Department of Environmental Engineering, Huaqiao University, Xiamen, Fujian  
361021, China.

\*Correspondence: Tel.: +86-592-6166216; Fax: +86-592-6162300.

Email address: lbh1225@hqu.edu.cn.

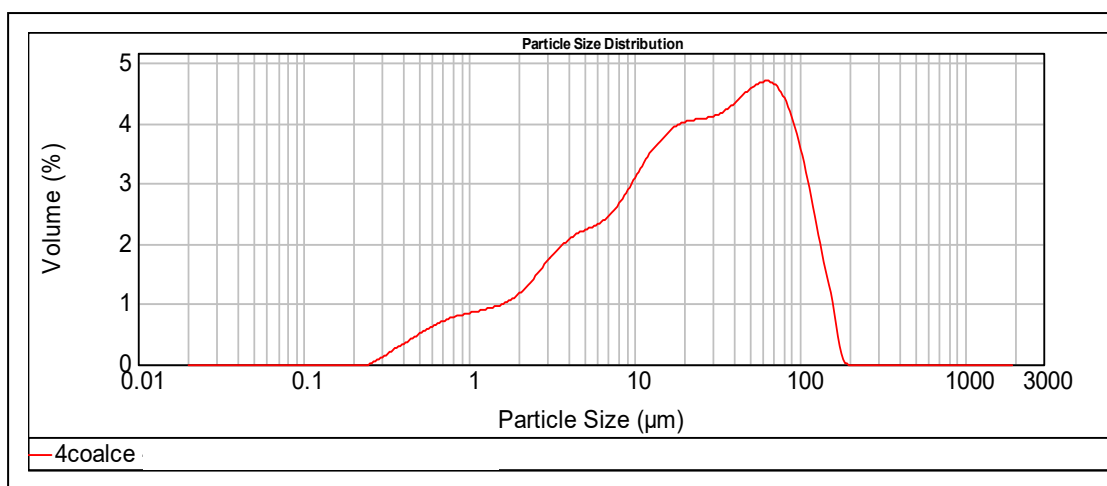

**Figure S1.** The particle size distribution of the catalyst

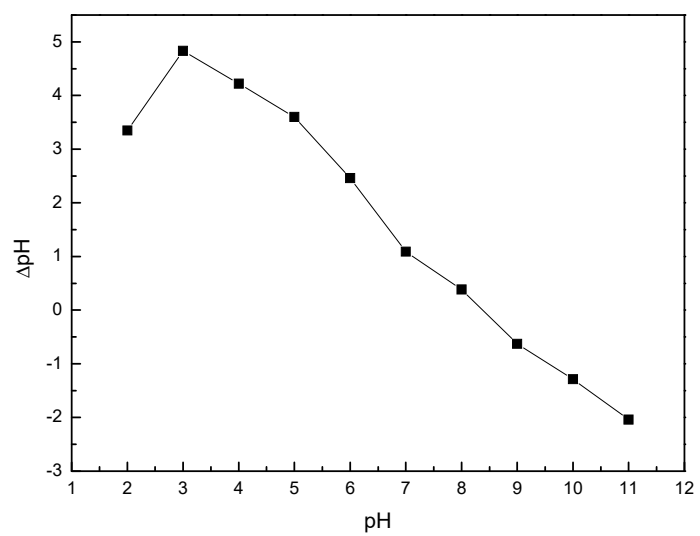

**Figure S2.** The  $\text{pH}_{\text{PZC}}$  value of catalyst

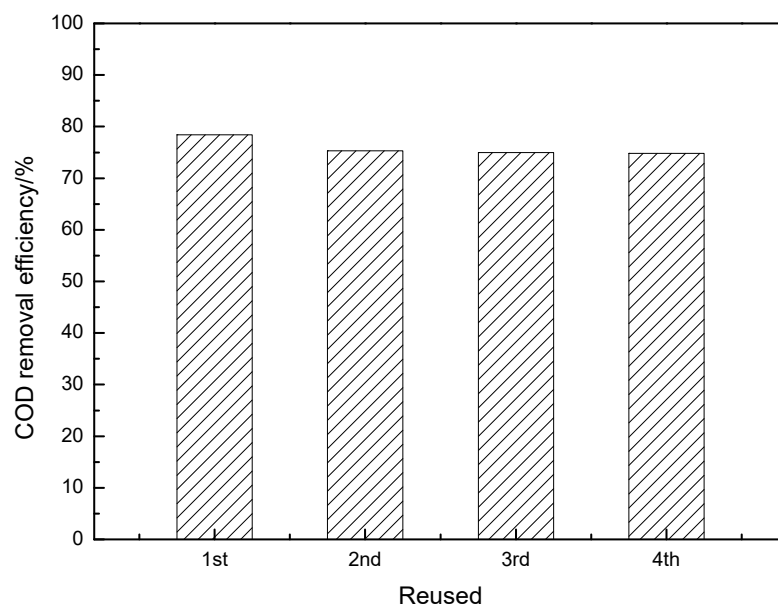

**Figure S3.** The effect of catalyst recycle times on the ozonation of RR 195. (RR 195 concentration 400 mg/L, catalyst dosage 3 g/L, gas flow 200 mL/min, ozone flow 15mg/min, pH 8, reaction time 20 min)
